# Supplementary material for: The influence of a tomato food matrix on the bioavailability and plasma kinetics of oral gamma-aminobutyric acid (GABA) and its precursor glutamate in healthy men
Source: Royal Society of Chemistry journal article supplement (doi:10.1039/d2fo01358d), 2022-01-01
Supplement: d2fo01358d1.pdf [file d2fo01358d1.pdf]

**Supplemental material 1: CONSORT flow diagram showing recruitment, inclusion, randomization and lost to follow-up.**

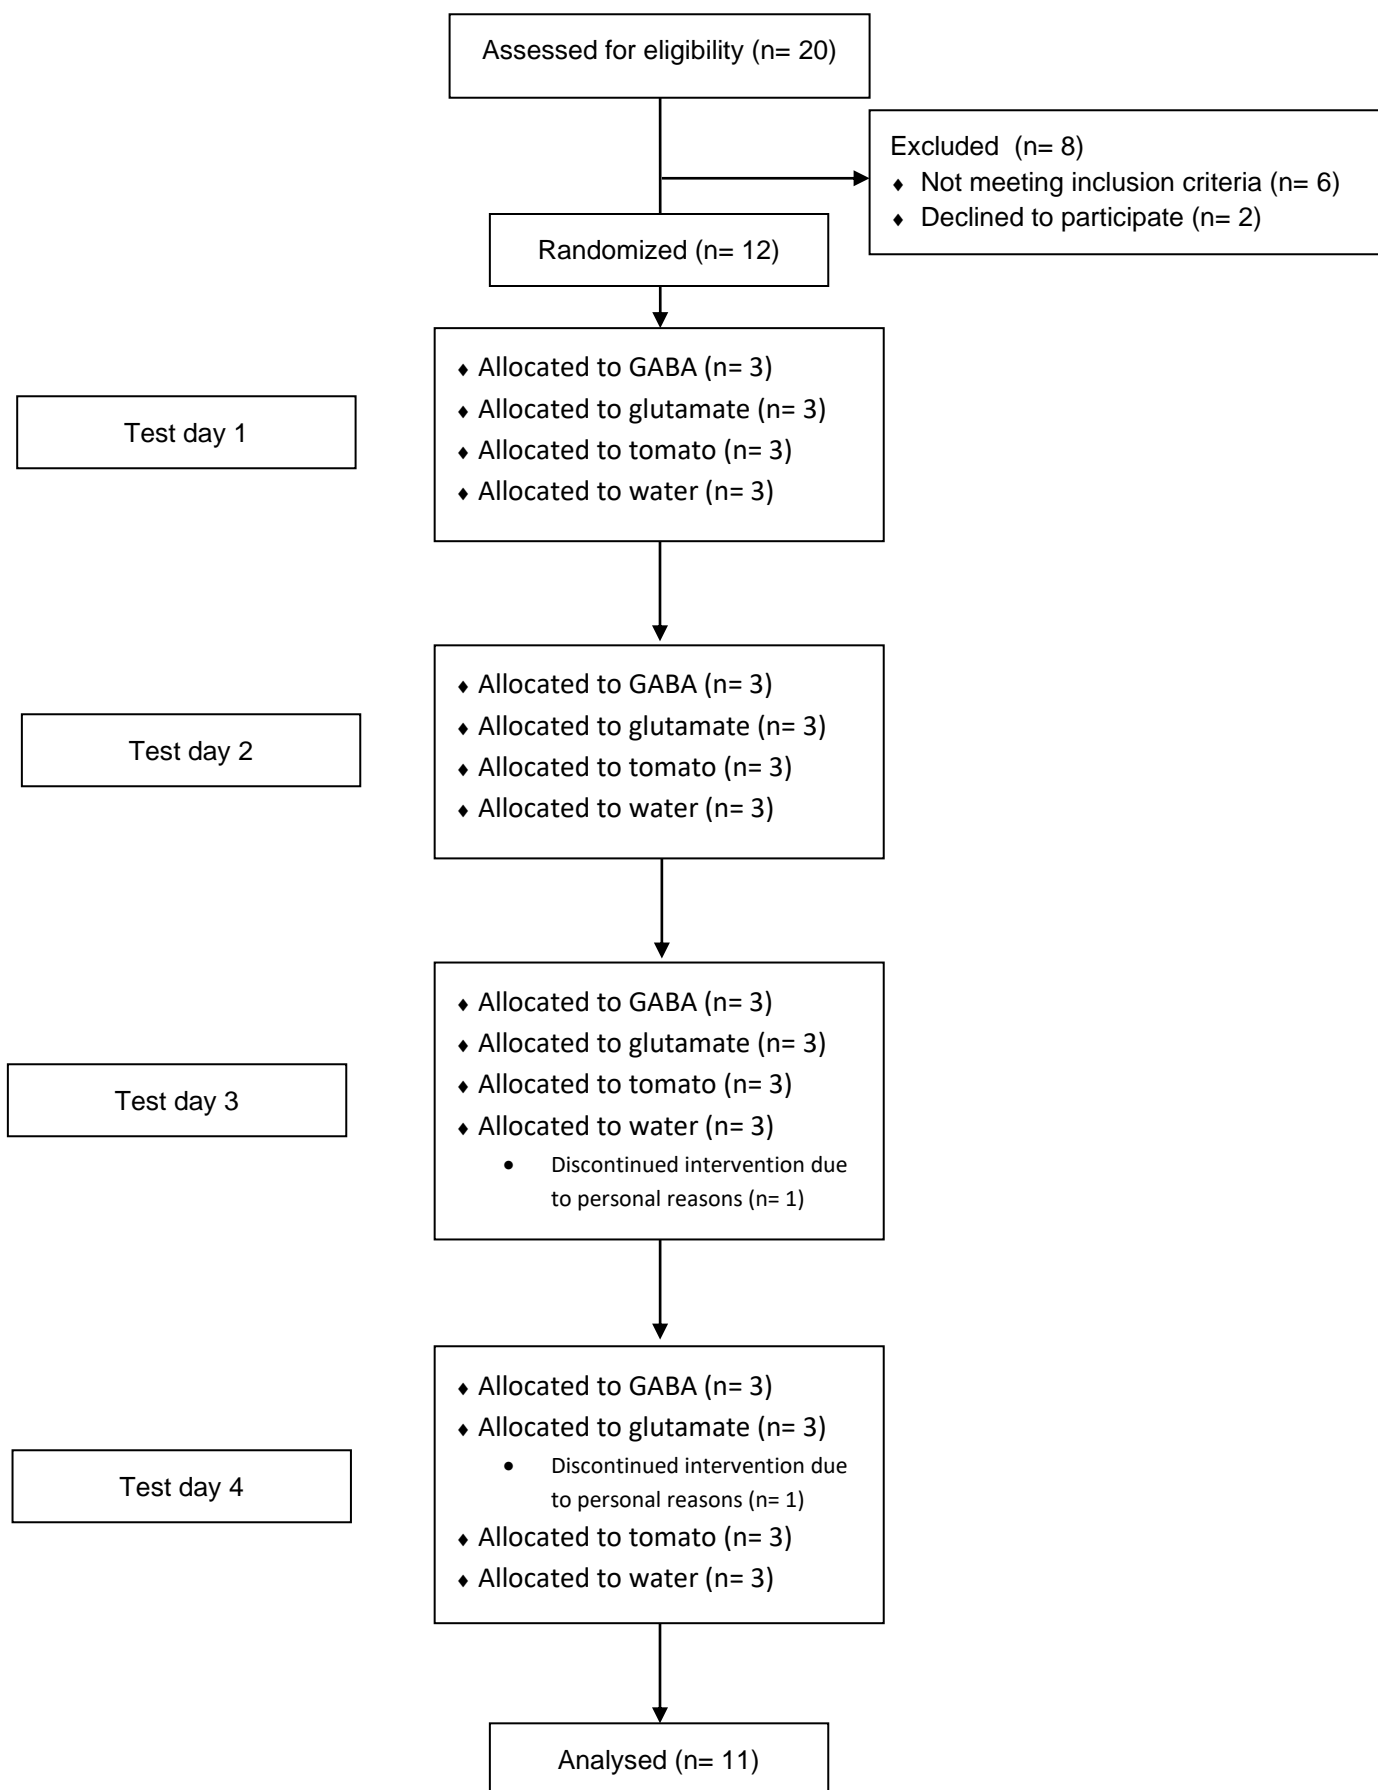

**Supplemental material 2: Composition of standardized meals A) the day before each test day and B) on each test day.** The day before each test day the participants were not limited to specific times to eat the products. Participants were received either a large (L) or an extra-large (XL) diet, depending on their energy requirement.

## A

| Products                       | Unit   | L (n=7) | XL (n=4) |
|--------------------------------|--------|---------|----------|
| Whole wheat bread              | Slice  | 8       | 10       |
| Light butter                   | 10 gr  | 4       | 5        |
| Cheese spread                  | 15 gr  | 2       | 3        |
| Nutella                        | 15 gr  | 2       | 3        |
| Strawberry jam                 | 15 gr  | 2       | 2        |
| Paté                           | 15 gr  | 2       | 2        |
| Granola with yoghurt and fruit | 170 gr | 1       | 1        |
| Orange juice                   | 200 mL | 1       | 1        |
| Semi-skimmed milk              | 200 mL | 1       | 2        |
| Apple                          | 1      | 1       | 1        |
| Tangerine                      | 1      | 2       | 2        |
| Nuts                           | 30 gr  | 1       | 1        |
| Tandoori chicken               | 450 gr | 1       | 1        |
| Custard                        | 135 mL | 2       | 2        |

## B

| Products                           | Unit   | L (n=7) | XL (n=4) |
|------------------------------------|--------|---------|----------|
| <b>t=4</b>                         |        |         |          |
| Low-protein bread                  | 35 gr  | 3       | 4        |
| Light butter                       | 10 gr  | 1       | 2        |
| Fruit sprinkles                    | 20 gr  | 2       | 2        |
| Nutella                            | 15 gr  | 1       | 2        |
| Ice tea                            | 200 mL | 1       | 1        |
| Apple                              | 1      | 1       | 1        |
| <b>t=7</b>                         |        |         |          |
| Apple                              | 1      | 1       | 1        |
| Soft drink (Dubbelfris)            | 200 mL | 1       | 1        |
| <b>t=10</b>                        |        |         |          |
| Nasi goreng (rice, ham, leek, egg) | grams  | 550     | 650      |
| Skimmed yoghurt with fruit taste   | grams  | 175     | 200      |
| <b>t=12</b>                        |        |         |          |
| Soft drink (Coca Cola/Sinas)       | 330 mL | 1       | 1        |

**Supplemental material 3: plasma kinetic parameters of GABA excluding the outlier.**

Parameters are calculated from plasma kinetics after ingestion of the GABA solution and pureed tomato. The 10-hour area under the curve shown is corrected for the area under the curve after taking placebo.

| <i>GABA</i>                  | Test product  |      |               |      | P-value |
|------------------------------|---------------|------|---------------|------|---------|
|                              | GABA solution |      | Pureed tomato |      |         |
|                              | Mean          | SEM  | Mean          | SEM  |         |
| C <sub>max</sub> (ng/mL)     | 68.6          | 9.4  | 84.1          | 12.4 | 0.074   |
| t <sub>max</sub> (h)         | 0.52          | 0.04 | 0.38          | 0.04 | 0.051   |
| AUC (ng/mL <sup>-1</sup> .h) | 53.1          | 8.4  | 78.3          | 15.7 | 0.061   |
